# Supplementary material
Source: PubMed Central journal article supplement (PMC2861721)
Supplement: supp_136_22_3801__5.pdf [file supp_136_22_3801__5.pdf]

**Table S1. Genotyping primers**

| Gene (allele)        | Primers (5' to 3')                                    | Polymorphism | Wild type     | Mutant            |
|----------------------|-------------------------------------------------------|--------------|---------------|-------------------|
| <i>slt-1(eh15)</i>   | CCCCGCTTTGCAACACAACCTC<br>CTGCACACCGTTGCTTATCT        | <i>DdeI</i>  | 273, 184, 151 | 279, 273, 184, 53 |
| <i>sax-3(ky200)</i>  | ATCGGTGAGGGAAGGTGTTTCGTTT<br>AGATGGCTTTGCACCACAGTTGAG | <i>FokI</i>  | 346           | 283, 63           |
| <i>cwn-2(ky736)</i>  | TCGCCTGGTCAAGCTCAAGTATGT<br>CGAAGGAAGTTGCATCCAACAGGT  | <i>HphI</i>  | 500, 137      | 637               |
| <i>cwn-2(ky756)</i>  | GAAGACGGTGCAAACAGGGACTTT<br>GGCAACATACTTGCAAACCTTCC   | Sequence     |               |                   |
| <i>cwn-2(ok895)</i>  | GAAGACGGTGCAAACAGGGACTTT<br>ATCCGTTGGCAATGCTCTTGT     | PCR length   | 545           | No product        |
|                      | TGTGAGCTTTTCAAAGATCATATGCC<br>TGGGGTGAACGAAACCCATAAG  | PCR length   | 1268          | 363               |
| <i>cam-1(gm122)</i>  | TGTCGCTGTATCAGAACGATGGCT<br>GTGCCAATTCTGATGGGCATTCTGT | <i>MseI</i>  | 397           | 274, 123          |
| <i>cam-1(ks52)</i>   | AGTAGCTCTTGTGGTGGTGGAGT<br>TATCCACGTTGATGGGTTGGTGGT   | PCR length   | 1389          | 325               |
|                      | TCACGAGTTGCTGAAGTTTCGAGT<br>TGTTGGTTGGACAATTGTGAGGGC  | PCR length   | 512           | No product        |
| <i>cfz-2(ok1201)</i> | AAATATGCATTTCTTGAGCACTACAGC<br>AAGAAGCCGGATTGGAAGTT   | PCR length   | 2899          | 1725              |
|                      | GATAACTGGAATCTGCTACGTGGG<br>GCACAACCTGCGATTGCTCCATAA  | PCR length   | 307           | No product        |
| <i>lin-17(n677)</i>  | TTCTACCTATCCCTGTGCATCT<br>CTAATTCTCTCTGTCACATGCTC     | <i>BanI</i>  | 287, 251      | 538               |
| <i>mig-1(e1787)</i>  | CGTTTGAAGTTGGCGGCCTAGAAT<br>TGTCCCTTGTCGCCTTATTCCACGA | Sequence     |               |                   |
| <i>cwn-1(ok546)</i>  | AATCACTGAAAGGGCTCACCAAGGA<br>ACTCTCCGTTGAGCGGAATCAACA | PCR length   | 1145          | 360               |
|                      | TCCTTAGCACAATCTCGGGTAAAC<br>TGCTTATGCAGATAGACCACACGG  | PCR length   | 492           | No product        |
| <i>lin-44(n1792)</i> | ATTACTTAAAGGCGCATACTGC<br>ATCGTCAATCCATCCTTGTG        | <i>BsrDI</i> | 240, 187      | 427               |
| <i>egl-20(n585)</i>  | TCCATCTGCCACATACAGTACGCA<br>CCGTGACGAGTTTCTGTAACCT    | Sequence     |               |                   |
| <i>mig-13(mu225)</i> | TATTAGTCAACCACCACCACCGCA<br>TGCATAGCTTTCCGGATCGAGTGT  | Sequence     |               |                   |
| <i>ced-3(n717)</i>   | TTGAAAGTGGGCGGAGTGAATTGC<br>GACTTCAGTCAGCAGCTCAACAAC  | Sequence     |               |                   |
