# Supplementary material
Source: PubMed Central journal article supplement (PMC2861721)
Supplement: supp_136_22_3801__6.pdf [file supp_136_22_3801__6.pdf]

Table S2. Strain list

| Strain  | Genotype                                                                                                    | Plasmid | Reference             |
|---------|-------------------------------------------------------------------------------------------------------------|---------|-----------------------|
| CX7465  | <i>cwn-2(ok895) IV; lin-15(n765) X; kyEx902[cwn-2 genomic::SL2::GFP, lin-15(+)]</i>                         | pJRK20  |                       |
| CX8072  | <i>lin-15(n765) X; kyEx902[cwn-2 genomic::SL2::GFP, lin-15(+)]</i>                                          | pJRK20  |                       |
| CX8504  | <i>cwn-2(ok895) IV; kyEx1464[elt-2::cwn-2, 100ng/uL, odr-1::RFP 50ng/uL]</i>                                | pJRK27  |                       |
| CX8392  | <i>cwn-2(ok895) IV; kyEx1380[myo-2::cwn-2, 100ng/uL, odr-1::RFP 50ng/uL]</i>                                | pJRK22  |                       |
| CX8391  | <i>cwn-2(ok895) IV; kyEx1379[slt-1::cwn-2, 100ng/uL, odr-1::RFP 50ng/uL]</i>                                | pJRK28  |                       |
| CX7762  | <i>cwn-2(ok895) IV; kyEx1183[myo-3::cwn-2, 100ng/uL, odr-1::RFP 50ng/uL]</i>                                | pJRK21  |                       |
| CX8381  | <i>cwn-2(ok895) IV; kyEx1369[hsp-16.41::cwn-2, 100ng/uL, odr-1::RFP 50ng/uL]</i>                            | pJRK23  |                       |
| CX10087 | <i>cam-1(gm122) II; gmls18 X; kyEx2285[pSP50 60ng/uL, ofm-1::dsRED 25ng/uL]</i>                             | pSP50   | Francis et al., 2005  |
| CX10088 | <i>cam-1(gm122) II; gmls18 X; kyEx2286[pDM109, 50ng/uL, odr-1::RFP 30ng/uL]</i>                             | pDM109  | Francis et al., 2005  |
| CX10464 | <i>cam-1(gm122) II; gmls18 X; kyEx2541[cam-1A::cam-1A, 1ng/uL, odr-1::RFP 50ng/uL]</i>                      | pJRK76  |                       |
| CX10454 | <i>cam-1(gm122) II; gmls18 X; kyEx2533[cam-1B::cam-1B, 1ng/uL, odr-1::RFP 50ng/uL]</i>                      | pJRK80  |                       |
| CX10449 | <i>cam-1(gm122) II; gmls18 X; kyEx2531[cam-1C::cam-1C, 5ng/uL, odr-1::RFP 50ng/uL]</i>                      | pJRK84  |                       |
| CX10478 | <i>cam-1(gm122) II; gmls18 X; kyEx2543[cam-1A::cam-1C, 1ng/uL, odr-1::RFP 50ng/uL]</i>                      | pJRK78  |                       |
| CX10477 | <i>cam-1(gm122) II; gmls18 X; kyEx2542[unc-119::cam-1A, 1ng/uL, ofm-1::dsRED 25ng/uL]</i>                   | pJRK97  |                       |
| CX10797 | <i>cam-1(gm122) II; gmls18 X; kyEx2765[ceh-24::cam-1A, 20ng/uL, ofm-1::dsRED 25ng/uL]</i>                   | pJRK102 |                       |
| CX11010 | <i>cam-1(gm122) II; gmls18 X; kyEx2881[mig-1::cam-1A, 20ng/uL, ofm-1::dsRED 25ng/uL]</i>                    | pJRK101 |                       |
| CX10999 | <i>cam-1(gm122) II; gmls18 X; kyEx2877[cwn-2::cam-1A, 1ng/uL, ofm-1::dsRED 25ng/uL]</i>                     | pJRK103 |                       |
| CX11000 | <i>cam-1(gm122) II; gmls18 X; kyEx2878[cwn-2::cam-1A, 1ng/uL, ofm-1::dsRED 25ng/uL]</i>                     | pJRK103 |                       |
| CX10898 | <i>cam-1(gm122) II; gmls18 X; kyEx2815[nsy-5::cam-1A, 5ng/uL, ofm-1::dsRED 25ng/uL]</i>                     | pJRK96  |                       |
| CX10948 | <i>cam-1(gm122) II; gmls18 X; kyEx2849[ncs-1::cam-1A, 5ng/uL, ofm-1::dsRED 25ng/uL]</i>                     | pJRK98  |                       |
| CX10855 | <i>kyEx2796[ceh-24::GFP, 20ng/uL, odr-1::RFP 50ng/uL]</i>                                                   | pJRK105 |                       |
| CX12132 | <i>mig-1(e1787) I; kyEx2796[ceh-24::GFP, 20ng/uL, odr-1::RFP 50ng/uL]</i>                                   | pJRK105 |                       |
| CX11171 | <i>cfz-2(ok1201) V; kyEx2796[ceh-24::GFP, 20ng/uL, odr-1::RFP 50ng/uL]</i>                                  | pJRK105 |                       |
| CX11101 | <i>cam-1(gm122) II; kyEx2796[ceh-24::GFP, 20ng/uL, odr-1::RFP 50ng/uL]</i>                                  | pJRK105 |                       |
| CX10858 | <i>sax-3(ky123) gmls18 X; kyEx2797[ceh-24::sax-3, 20ng/uL, ofm-1::dsRED 25ng/uL]</i>                        | pJRK119 |                       |
| CX10909 | <i>sax-3(ky123) gmls18 X; kyEx2822[ceh-24::sax-3, 20ng/uL, ofm-1::dsRED 25ng/uL]</i>                        | pJRK119 |                       |
| CX12031 | <i>ced-3(n717) IV; kyEx3294[ceh-24::egl-1, 2.5ng/uL, pSM, 25ng/uL, elt-2::mcherry, 1ng/uL]</i>              | pJRK134 |                       |
| CX12665 | <i>cwn-2(ky756) ced-3(n717) IV; kyEx3294[ceh-24::egl-1, 2.5ng/uL, pSM, 25ng/uL, elt-2::mcherry, 1ng/uL]</i> | pJRK134 |                       |
| CX12206 | <i>mig-1(e1787) I; cam-1(gm122) II; gmls18 X; kyEx2285[pSP50 60ng/uL, ofm-1::dsRED 25ng/uL]</i>             | pSP50   | Francis et al., 2005  |
| CX12668 | <i>mig-1(e1787) I; cam-1(ks52) II; kyEx3400 [ceh-24::mig-1A 5ng/uL, ofm-1::dsRED 25ng/uL]</i>               | pJRK135 |                       |
| CX10483 | <i>cam-1(gm122) II; sax-3(ky200) gmls18 X; kyEx2285[pSP50 60ng/uL, ofm-1::dsRED 25ng/uL]</i>                | pSP50   | Francis et al., 2005  |
| CX11126 | <i>cfz-2(ok1201) V; gmls18 X; kyEx2940[ceh-24::cfz-2 20ng/uL, ofm-1::dsRED, 25ng/uL]</i>                    | pJRK129 |                       |
| CX11125 | <i>cfz-2(ok1201) V; gmls18 X; kyEx2939[ceh-24::cfz-2 20ng/uL, ofm-1::dsRED, 25ng/uL]</i>                    | pJRK129 |                       |
| CX12667 | <i>kyls510 II; kyEx3399 [cam-1A::mCherry, 50ng/uL]</i>                                                      | pJRK85  |                       |
| CX12666 | <i>kyls510 II; cwn-2(ky756) IV; kyEx3398 [cam-1A::mCherry, 50ng/uL]</i>                                     | pJRK85  |                       |
| CX11133 | <i>kyEx2942[mig-1::myrGFP, 20ng/uL, ofm-1::dsRED 25ng/uL]</i>                                               | pJRK109 |                       |
| CX11186 | <i>cwn-2(ky756) IV; kyEx2942[mig-1::myrGFP, 20ng/uL, ofm-1::myrGFP, 25ng/uL]</i>                            | pJRK109 |                       |
| CX10878 | <i>kyls510 II</i>                                                                                           | pJRK106 |                       |
| NG3146  | <i>gmls18 X</i>                                                                                             | pTF1    | Lai and Garriga, 2004 |
| CX6232  | <i>slt-1(eh15) gmls18 X</i>                                                                                 |         |                       |
| CX6654  | <i>sax-3(ky200) gmls18 X</i>                                                                                |         |                       |
| CX7134  | <i>cwn-2(ky736) IV; gmls18 X</i>                                                                            |         |                       |
| CX7135  | <i>cwn-2(ky756) IV; gmls18 X</i>                                                                            |         |                       |
| CX7192  | <i>cwn-2(ok895) IV; gmls18 X</i>                                                                            |         |                       |
| CX7715  | <i>cam-1(gm122) II; gmls18 X</i>                                                                            |         |                       |
| CX8224  | <i>cfz-2(ok1201) V; gmls18 X</i>                                                                            |         |                       |
| CX8245  | <i>lin-17(n677) I; gmls18 X</i>                                                                             |         |                       |
| CX8244  | <i>lin-18(e620) gmls18 X</i>                                                                                |         |                       |
| CX9175  | <i>mig-1(e1787) I; gmls18 X</i>                                                                             |         |                       |
| CX7615  | <i>cam-1(gm122) II; cwn-2(ky756) IV; gmls18 X</i>                                                           |         |                       |
| CX8266  | <i>cfz-2(ok1201) V; cwn-2(ky756) IV; gmls18 X</i>                                                           |         |                       |
| CX8505  | <i>cfz-2(ok1201) V; cam-1(gm122) II; gmls18 X</i>                                                           |         |                       |
| CX8929  | <i>lin-17(n677) I; cfz-2(ok1201) V; gmls18 X</i>                                                            |         |                       |
| CX9169  | <i>mig-1(e1787) I; cfz-2(ok1201) V; gmls18 X</i>                                                            |         |                       |
| CX9168  | <i>mig-1(e1787) I; cam-1(gm122) II; gmls18 X</i>                                                            |         |                       |
| CX9474  | <i>cwn-1(ok546) II; gmls18 X</i>                                                                            |         |                       |
| CX9674  | <i>lin-44(n1792) I; gmls18 X</i>                                                                            |         |                       |
| CX9366  | <i>lin-44(n1792) I; cwn-1(ok546) II; gmls18 X</i>                                                           |         |                       |
| CX9681  | <i>lin-44(n1792) I; cwn-2(ky756) IV; gmls18 X</i>                                                           |         |                       |
| CX9130  | <i>cwn-1(ok546) II; cwn-2(ky756) IV; gmls18 X</i>                                                           |         |                       |
| CX10068 | <i>lin-44(n1792) I; cwn-1(ok546) II; egl-20(n585) IV; gmls18 X</i>                                          |         |                       |
| CX8717  | <i>cam-1(ks52) II; gmls18 X</i>                                                                             |         |                       |
| CX10871 | <i>mig-1(e1787) I; cam-1(ks52) II; gmls18 X</i>                                                             |         |                       |
| CX11032 | <i>mig-13(mu225) gmls18 X</i>                                                                               |         |                       |
| CX11093 | <i>cam-1(ks52) II; mig-13(mu225) gmls18 X</i>                                                               |         |                       |
| CX10129 | <i>cam-1(ks52) II; sax-3(ky200) gmls18 X</i>                                                                |         |                       |
| CX10897 | <i>cam-1(ks52) II; cfz-2(ok1201) V; gmls18 X</i>                                                            |         |                       |
| CX12669 | <i>lin-17(n677) I; cam-1(ks52) II; gmls18 X</i>                                                             |         |                       |
| CX8908  | <i>cam-1(ks52) II; lin-18(e620) gmls18 X</i>                                                                |         |                       |
| EU452   | <i>mom-5(zu193) unc-13(e1091) / hT2 I; + / hT2[bli-4(e937) let-? (h661)] III</i>                            |         |                       |
| CX10479 | <i>cam-1(gm122) II; sax-3(ky200) gmls18 X</i>                                                               |         |                       |
| MT1522  | <i>ced-3(n717) IV</i>                                                                                       |         |                       |
| CX7424  | <i>cwn-2(ky756) IV; akIs3[nmr-1::GFP] V</i>                                                                 |         |                       |
| VM484   | <i>akIs3[nmr-1::GFP] V</i>                                                                                  |         |                       |

Reference  
Lai, T. and Garriga, G. (2004). The conserved kinase UNC-51 acts with VAB-8 and UNC-14 to regulate axon outgrowth in *C. elegans*. *Development* **131**, 5991-6000.
