# Supplementary material
Source: PubMed Central journal article supplement (PMC2861721)
Supplement: supp_136_22_3801__7.pdf [file supp_136_22_3801__7.pdf]

**Table S3. Primary data from transgenic rescue experiments demonstrating rescue or absence of rescue of *cwn-2* (top), *cam-1* (middle) and *cfz-2* (bottom)**

|                                        | Background        | Penetrance (%) | Anterior nerve ring (n) | Normal nerve ring (n) | Total (n) |
|----------------------------------------|-------------------|----------------|-------------------------|-----------------------|-----------|
| <b><i>cwn-2</i> rescue experiments</b> |                   |                |                         |                       |           |
| <i>cwn-2</i> genomic                   | With transgene    | 0.0            | 0                       | 48                    | 48        |
|                                        | Without transgene | 14.9           | 7                       | 40                    | 47        |
| <i>myo-3::cwn-2</i>                    | With transgene    | 0.0            | 0                       | 26                    | 26        |
|                                        | Without transgene | 54.3           | 25                      | 21                    | 46        |
| <i>myo-2::cwn-2</i>                    | With transgene    | 7.1            | 5                       | 65                    | 70        |
|                                        | Without transgene | 70.4           | 50                      | 21                    | 71        |
| <i>elt-2::cwn-2</i>                    | With transgene    | 10.0           | 1                       | 9                     | 10        |
|                                        | Without transgene | 83.3           | 15                      | 3                     | 18        |
| <i>slt-1::cwn-2</i>                    | With transgene    | 0.0            | 0                       | 27                    | 27        |
|                                        | Without transgene | 48.4           | 15                      | 16                    | 31        |
| <b><i>cam-1</i> rescue experiments</b> |                   |                |                         |                       |           |
| <i>cam-1</i> genomic DNA (pDM109)      | With transgene    | 1.1            | 1                       | 87                    | 88        |
|                                        | Without transgene | 15.8           | 3                       | 16                    | 19        |
| <i>cam-1A::cam-1A</i>                  | With transgene    | 6.3            | 4                       | 59                    | 63        |
|                                        | Without transgene | 42.9           | 9                       | 12                    | 21        |
| <i>cam-1B::cam-1B</i>                  | With transgene    | 20.3           | 14                      | 55                    | 69        |
|                                        | Without transgene | 51.1           | 23                      | 22                    | 45        |
| <i>cam-1C::cam-1C</i>                  | With transgene    | 23.8           | 20                      | 64                    | 84        |
|                                        | Without transgene | 20.0           | 9                       | 36                    | 45        |
| <i>cam-1A::cam-1C</i>                  | With transgene    | 13.6           | 9                       | 57                    | 66        |
|                                        | Without transgene | 41.9           | 49                      | 68                    | 117       |
| <i>unc-119::cam-1A</i>                 | With transgene    | 3.8            | 2                       | 51                    | 53        |
|                                        | Without transgene | 36.8           | 21                      | 36                    | 57        |
| <i>ceh-24::cam-1A</i>                  | With transgene    | 11.3           | 6                       | 47                    | 53        |
|                                        | Without transgene | 42.7           | 35                      | 47                    | 82        |
| <i>cwn-2::cam-1A</i>                   | With transgene    | 27.9           | 17                      | 44                    | 61        |
|                                        | Without transgene | 30.2           | 16                      | 37                    | 53        |
| <i>mig-1::cam-1A</i>                   | With transgene    | 7.9            | 3                       | 35                    | 38        |
|                                        | Without transgene | 22.7           | 15                      | 51                    | 66        |
| <i>nsy-5::cam-1A</i>                   | With transgene    | 23.9           | 21                      | 67                    | 88        |
|                                        | Without transgene | 32.8           | 41                      | 84                    | 125       |
| <i>ncs-1::cam-1A</i>                   | With transgene    | 37.7           | 29                      | 48                    | 77        |
|                                        | Without transgene | 30.8           | 32                      | 72                    | 104       |
| <i>opt-3::cam-1A</i>                   | With transgene    | 44.1           | 15                      | 19                    | 34        |
|                                        | Without transgene | 29.4           | 15                      | 36                    | 51        |
| <b><i>cfz-2</i> rescue experiments</b> |                   |                |                         |                       |           |
| <i>ceh-24::cfz-2</i> line 1            | With transgene    | 30.6           | 19                      | 43                    | 62        |
|                                        | Without transgene | 17.8           | 18                      | 83                    | 101       |
| <i>ceh-24::cfz-2</i> line 2            | With transgene    | 26.5           | 18                      | 50                    | 68        |
|                                        | Without transgene | 17.5           | 11                      | 52                    | 63        |

For presentation in Fig. 3D and Fig. 6B, the data were normalized such that the defects in the animals without the transgene were comparable for all genotypes (100%). See Materials and methods for details.
