# Supplementary material
Source: PubMed Central journal article supplement (PMC2861721)
Supplement: supp_136_22_3801__8.pdf [file supp_136_22_3801__8.pdf]

**Table S4. Plasmids used**

| Plasmid    | Description                      | Promoter and coding region                                                                                                                                                                                                                              | Vector     |
|------------|----------------------------------|---------------------------------------------------------------------------------------------------------------------------------------------------------------------------------------------------------------------------------------------------------|------------|
| pSM        | Modified Fire Vector             | Contains <i>FseI</i> and <i>AsclI</i> sites for cloning promoters, and <i>NheI</i> and <i>SacI</i> sites for cloning <i>cam-1</i> cDNAs                                                                                                                 |            |
| pJG7       | Modified Fire Vector             | Contains <i>FseI</i> and <i>AsclI</i> sites for cloning promoters and <i>SmaI</i> site for genomic fragments, and an SL2::GFP sequence for monitoring expression                                                                                        |            |
| pJG13      | Modified Fire Vector             | Contains <i>FseI</i> and <i>AsclI</i> sites for cloning promoters, <i>NheI</i> and <i>SacI</i> sites for cloning <i>cam-1</i> cDNA, <i>KpnI</i> and <i>SacI</i> sites for cloning <i>cwn-2</i> cDNA, and an SL2::CFP sequence for monitoring expression |            |
| pSM-GFP    | Modified Fire Vector             | Contains <i>FseI</i> and <i>AsclI</i> sites for cloning promoters, a synthetic intron, then GFP                                                                                                                                                         |            |
| pSM-cherry | Modified Fire Vector             | Contains <i>FseI</i> and <i>AsclI</i> sites for cloning promoters, a synthetic intron, then mCherry                                                                                                                                                     |            |
| pSM-myrGFP | Modified Fire Vector             | Contains <i>FseI</i> and <i>AsclI</i> sites for cloning promoters, a synthetic intron, then myristoylated GFP cDNA                                                                                                                                      |            |
| pJRK20     | <i>cwn-2</i> genomic             | W01B6 genomic fragment from <i>AfIII</i> to <i>Faul</i>                                                                                                                                                                                                 | pJG7       |
| pJRK23     | <i>hsp-16.41::cwn-2</i>          | Heat-shock promoter:: <i>cwn-2</i> cDNA                                                                                                                                                                                                                 | pPD49.83   |
| pJRK22     | <i>myo-2::cwn-2</i>              | <i>myo-2</i> promoter:: <i>cwn-2</i> cDNA ( <i>NheI</i> and <i>SacI</i> sites)                                                                                                                                                                          | pPD30.69   |
| pJRK21     | <i>myo-3::cwn-2</i>              | <i>myo-3</i> promoter:: <i>cwn-2</i> cDNA ( <i>KpnI</i> and <i>SacI</i> sites)                                                                                                                                                                          | pPD96.52   |
| pJRK27     | <i>elt-2::cwn-2</i>              | 5 kb upstream of <i>elt-2</i> ATG and <i>cwn-2</i> cDNA                                                                                                                                                                                                 | pJG13      |
| pJRK28     | <i>slt-1::cwn-2</i>              | 4 kb upstream of <i>slt-1</i> ATG and <i>cwn-2</i> cDNA                                                                                                                                                                                                 | pJG13      |
| pJRK76     | <i>cam-1A::cam-1A</i>            | 7.8 kb upstream of <i>cam-1A</i> ATG and <i>cam-1A</i> cDNA                                                                                                                                                                                             | pSM        |
| pJRK80     | <i>cam-1B::cam-1B</i>            | 5.4 kb upstream of <i>cam-1B</i> ATG and <i>cam-1B</i> cDNA                                                                                                                                                                                             | pSM        |
| pJRK84     | <i>cam-1C::cam-1C</i>            | 5.1 kb upstream of <i>cam-1C</i> ATG and <i>cam-1C</i> cDNA                                                                                                                                                                                             | pSM        |
| pJRK78     | <i>cam-1A::cam-1C</i>            | 7.8 kb upstream of <i>cam-1A</i> ATG and <i>cam-1C</i> cDNA                                                                                                                                                                                             | pSM        |
| pJRK97     | <i>unc-119::cam-1A</i>           | 2.2 kb upstream of <i>unc-119</i> ATG and <i>cam-1A</i> cDNA                                                                                                                                                                                            | pJG13      |
| pJRK102    | <i>ceh-24::cam-1A</i>            | 2.9 kb upstream of <i>ceh-24</i> ATG and <i>cam-1A</i> cDNA                                                                                                                                                                                             | pJG13      |
| pJRK101    | <i>mig-1::cam-1A</i>             | 6.5 kb upstream of <i>mig-1</i> ATG and <i>cam-1A</i> cDNA                                                                                                                                                                                              | pJG13      |
| pJRK103    | <i>cwn-2::cam-1A</i>             | 3.4 kb upstream of <i>cwn-2</i> ATG and <i>cam-1A</i> cDNA                                                                                                                                                                                              | pSM        |
| pJRK96     | <i>nsy-5::cam-1A</i>             | 5.6 kb upstream of <i>nsy-5</i> ATG and <i>cam-1A</i> cDNA                                                                                                                                                                                              | pJG13      |
| pJRK100    | <i>opt-3::cam-1A</i>             | 2.5 kb upstream of <i>opt-3</i> ATG and <i>cam-1A</i> cDNA                                                                                                                                                                                              | pSM        |
| pJRK98     | <i>ncs-1::cam-1A</i>             | 2.1 kb upstream of <i>ncs-1</i> ATG and <i>cam-1A</i> cDNA                                                                                                                                                                                              | pSM        |
| pJRK119    | <i>ceh-24::sax-3</i>             | 2.9 kb upstream of <i>ceh-24</i> ATG and <i>cam-1A</i> cDNA                                                                                                                                                                                             | pJG13      |
| pJRK105    | <i>ceh-24::GFP</i>               | 2.9 kb upstream of <i>ceh-24</i> ATG and GFP cDNA                                                                                                                                                                                                       | pSM-GFP    |
| pSP50      | <i>cam-1</i> N-terminal deletion | <i>cam-1</i> genomic DNA with deletion of N-terminal cytoplasmic domain (Francis et al., 2005)                                                                                                                                                          |            |
| pDM109     | <i>cam-1</i> genomic::GFP        | <i>cam-1</i> genomic DNA with N-terminal GFP fusion (Francis et al., 2005)                                                                                                                                                                              |            |
| pJRK135    | <i>ceh-24::mig-1A</i>            | 2.9 kb upstream of <i>ceh-24</i> ATG and <i>mig-1A</i> cDNA                                                                                                                                                                                             | pSM        |
| pJRK134    | <i>ceh-24::egl-1</i>             | 2.9 kb upstream of <i>ceh-24</i> ATG and <i>egl-1</i> cDNA                                                                                                                                                                                              | pSM        |
| pJRK106    | <i>ceh-24::myrGFP</i>            | 2.9 kb upstream of <i>ceh-24</i> ATG and myristoylated GFP cDNA                                                                                                                                                                                         | pSM-myrGFP |
| pJRK129    | <i>ceh-24::cfz-2</i>             | 2.9 kb upstream of <i>ceh-24</i> ATG and <i>cfz-2</i> cDNA                                                                                                                                                                                              | pSM        |
| pJRK85     | <i>cam-1A::mCherry</i>           | 7.8 kb upstream of <i>cam-1A</i> ATG and mCherry cDNA                                                                                                                                                                                                   | pSM-cherry |
| pJRK109    | <i>mig-1::myrGFP</i>             | 6.5 kb upstream of <i>mig-1</i> ATG and myristoylated GFP cDNA                                                                                                                                                                                          | pSM-myrGFP |

pPD vectors generated by A. Fire and colleagues are described in Fire et al. (1990). Some *cam-1* clones are described in Francis et al. (2005).

## References

- Fire, A., Harrison, S. W. and Dixon, D. (1990). A modular set of lacZ fusion vectors for studying gene expression in *Caenorhabditis elegans*. *Gene* **93**, 189-198.
- Francis, M. M., Evans, S. P., Jensen, M., Madsen, D. M., Mancuso, J., Norman, K. R. and Maricq, A. V. (2005). The Ror receptor tyrosine kinase CAM-1 is required for ACR-16-mediated synaptic transmission at the *C. elegans* neuromuscular junction. *Neuron* **46**, 581-594.
