# Supplementary material
Source: PubMed Central journal article supplement (PMC2861721)
Supplement: supp_136_22_3801__9.pdf [file supp_136_22_3801__9.pdf]

**Axon Guidance defects in SIA/SIB/SMD neurons**

|                      | No defect (%) | Anterior axon directly from ganglion (%) | Anterior axon from nerve ring (%) | Anterior axon from posterior (%) | n  |
|----------------------|---------------|------------------------------------------|-----------------------------------|----------------------------------|----|
| <i>wt</i>            | 94.8          | 3.4                                      | 0                                 | 1.7                              | 58 |
| <i>mig-1(e1787)</i>  | 95.8          | 1.1                                      | 0                                 | 3.1                              | 95 |
| <i>cfz-2(ok1201)</i> | 83            | 11.3                                     | 0                                 | 7.5                              | 53 |
| <i>cam-1(gm122)</i>  | 28.1          | 38.6                                     | 40.4                              | 14                               | 57 |
| <i>cwn-2(ky756)</i>  | 40.6          | 43.8                                     | 12.5                              | 17.1                             | 64 |

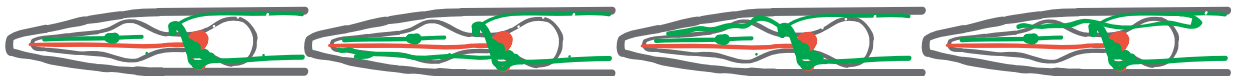

Supplemental Table 2
