# Supplementary material
Source: PubMed Central journal article supplement (PMC2861721)

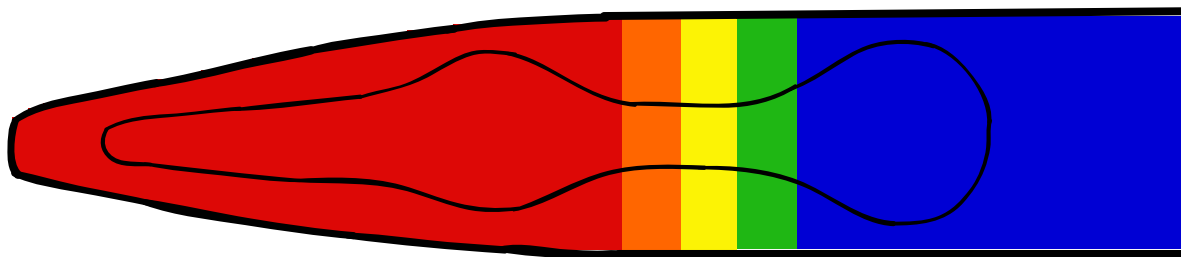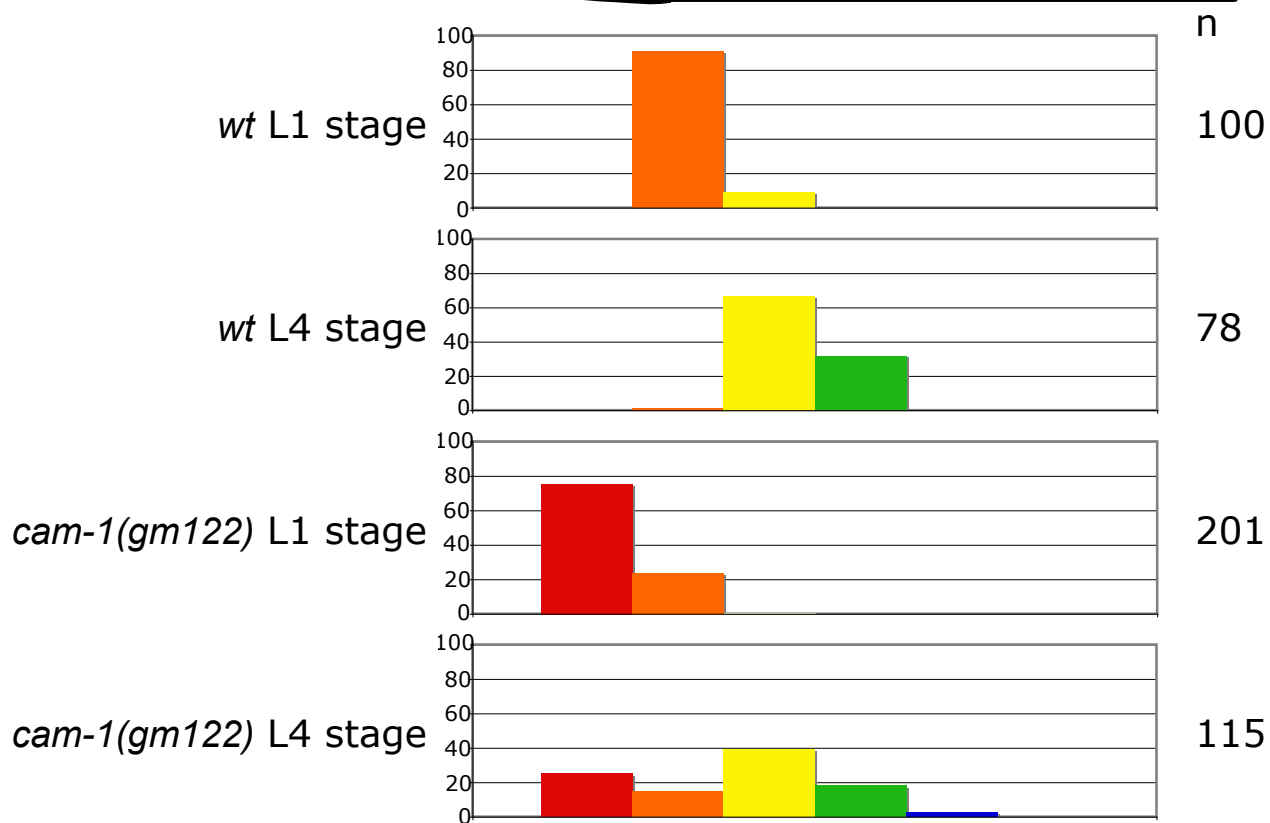

Supplement: supp_136_22_3801__1.pdf [file supp_136_22_3801__1.pdf]

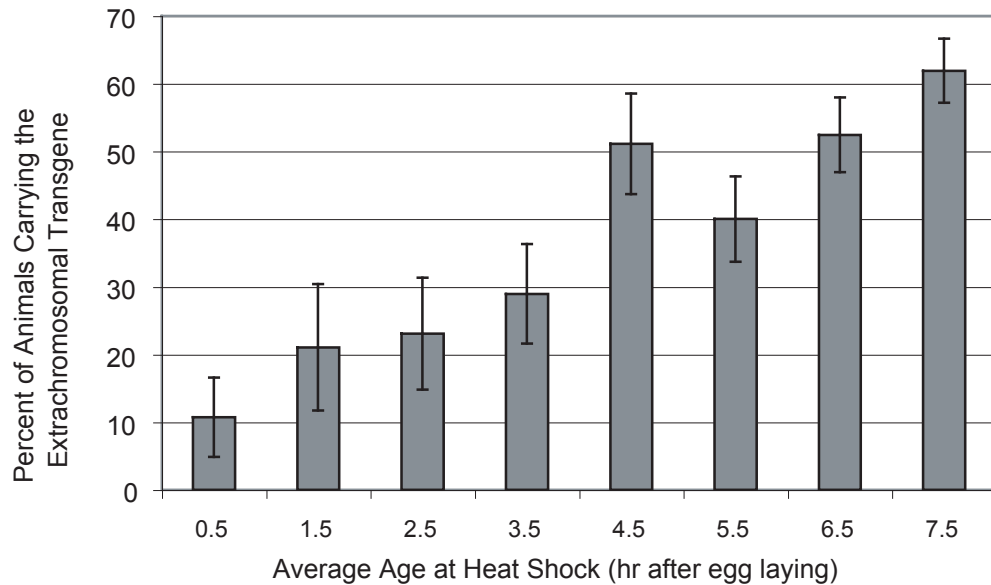

Supplement: supp_136_22_3801__2.pdf [file supp_136_22_3801__2.pdf]

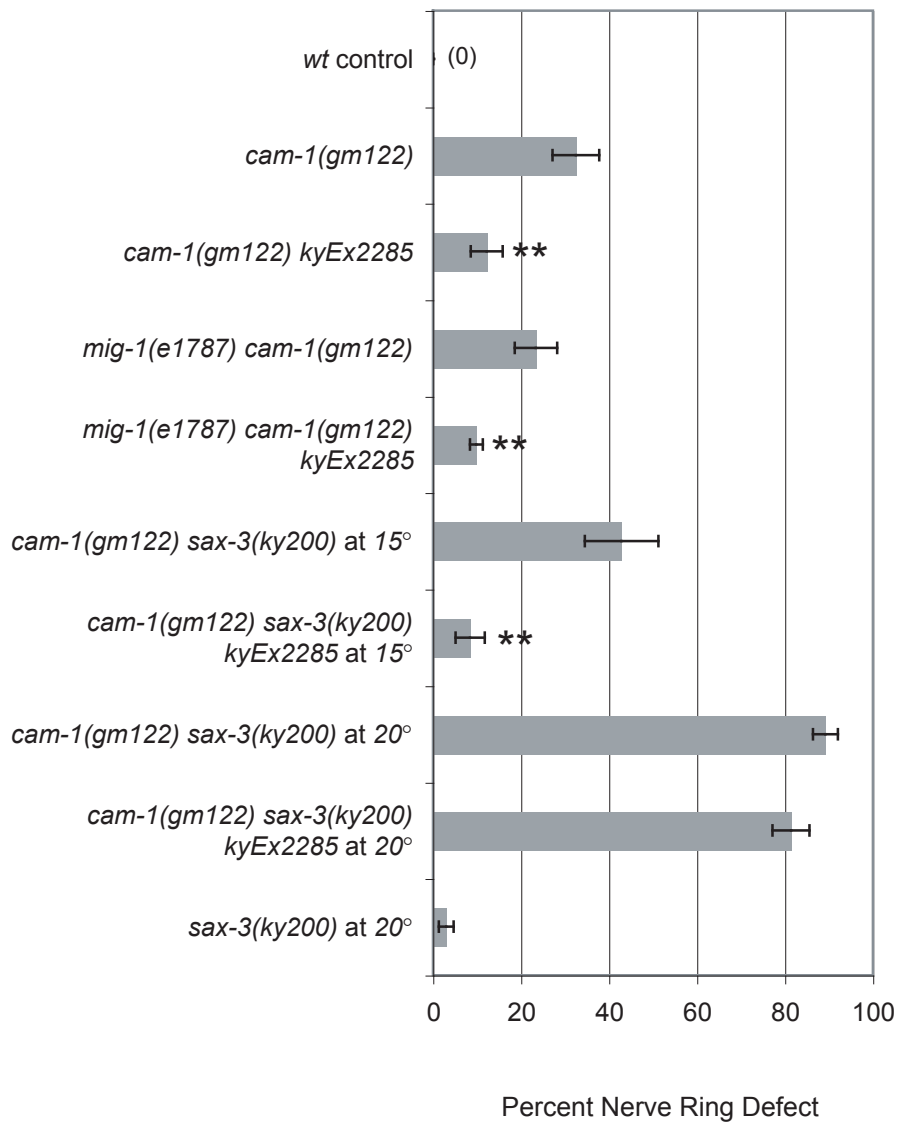

Supplement: supp_136_22_3801__3.pdf [file supp_136_22_3801__3.pdf]

**A***wt*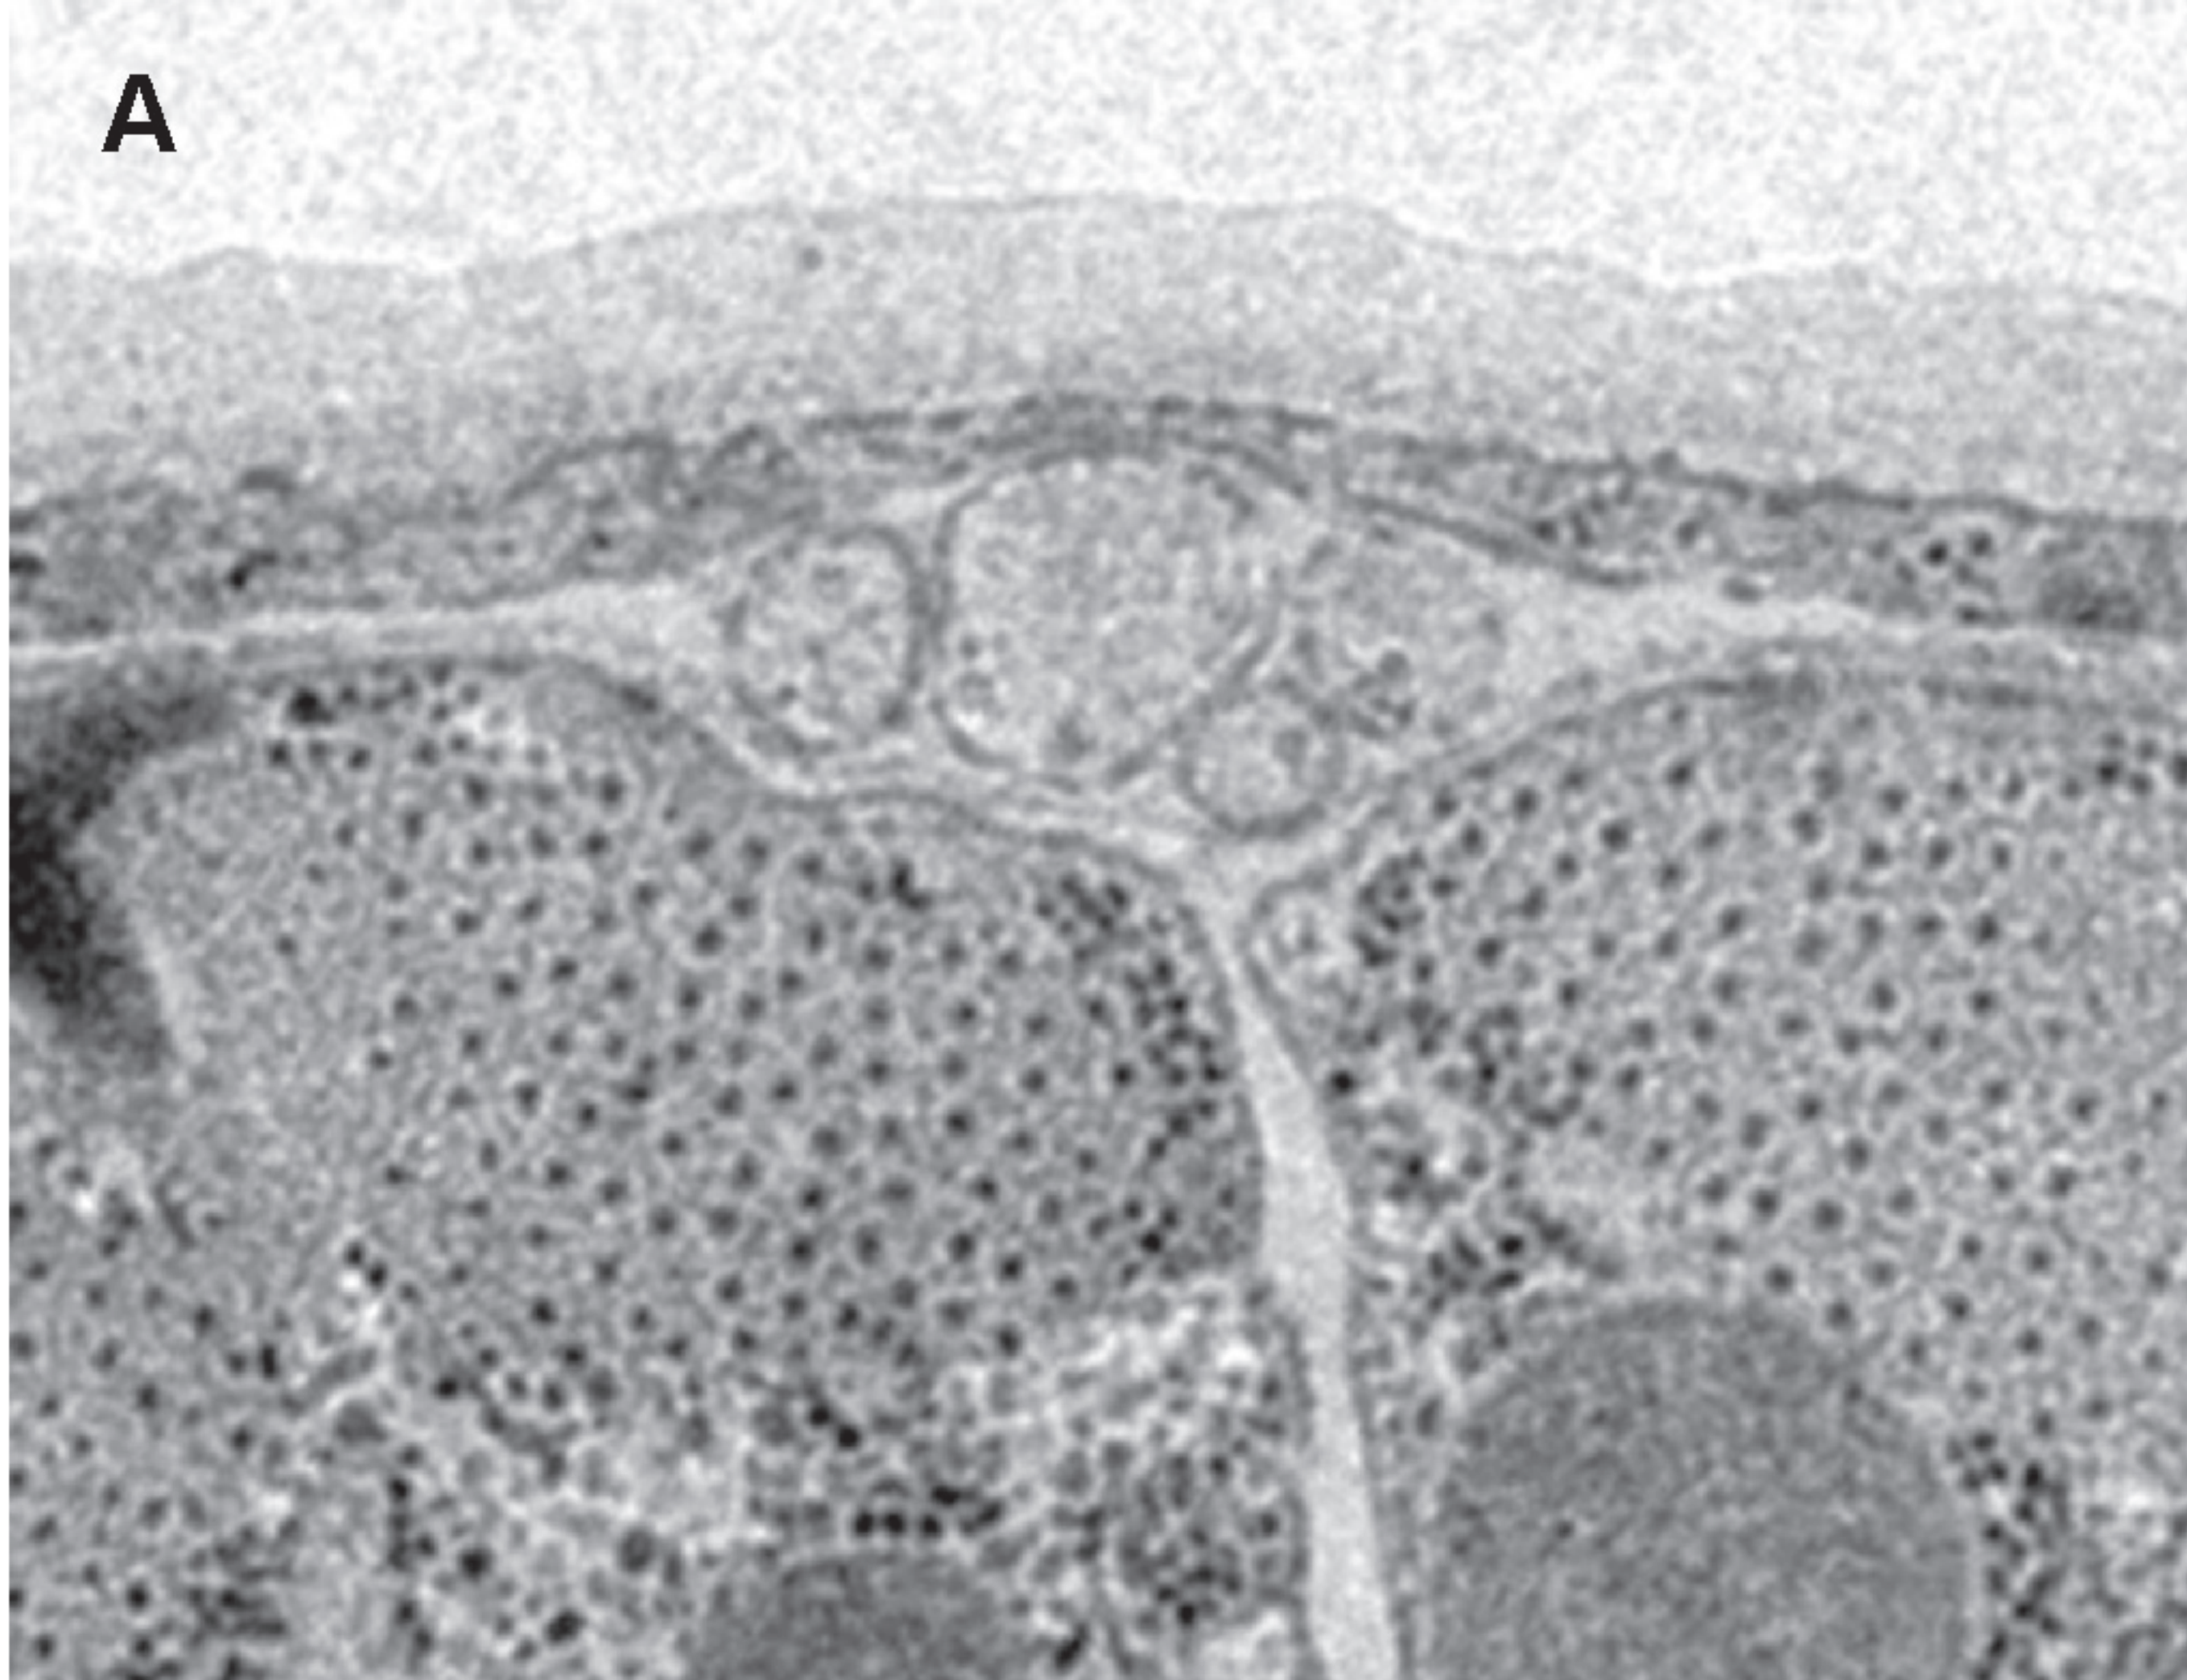**B**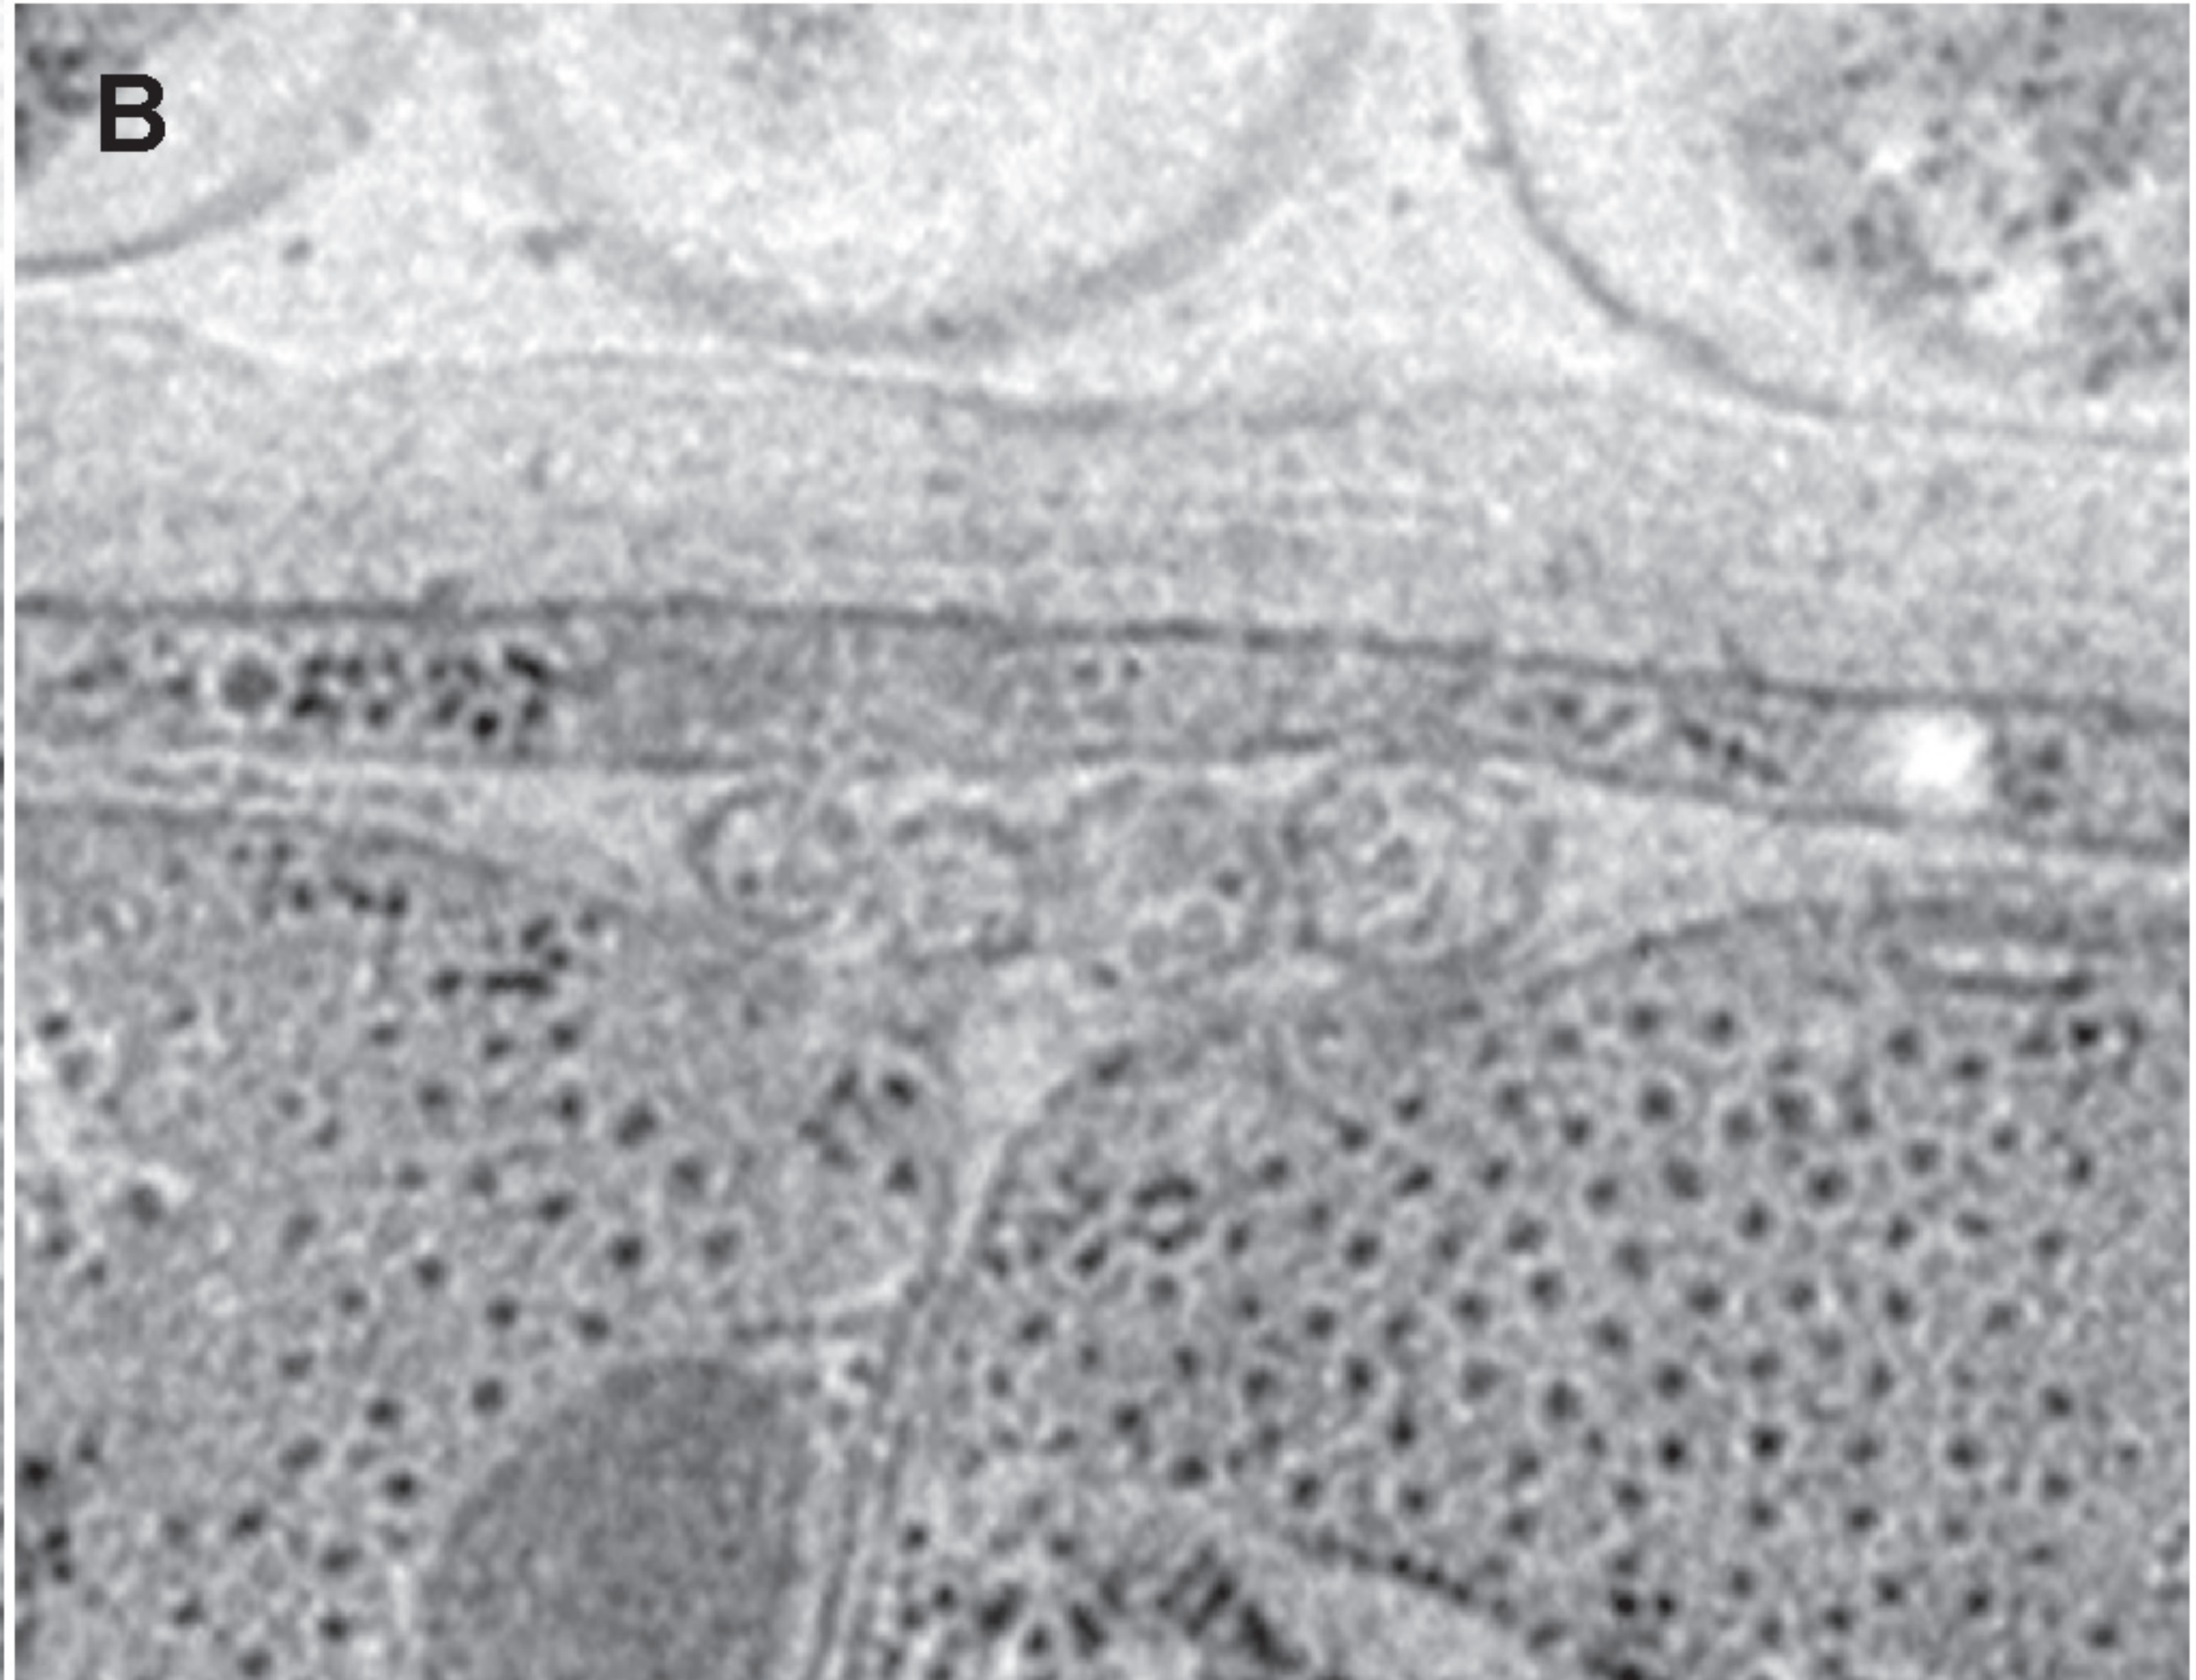**C***cwn-2*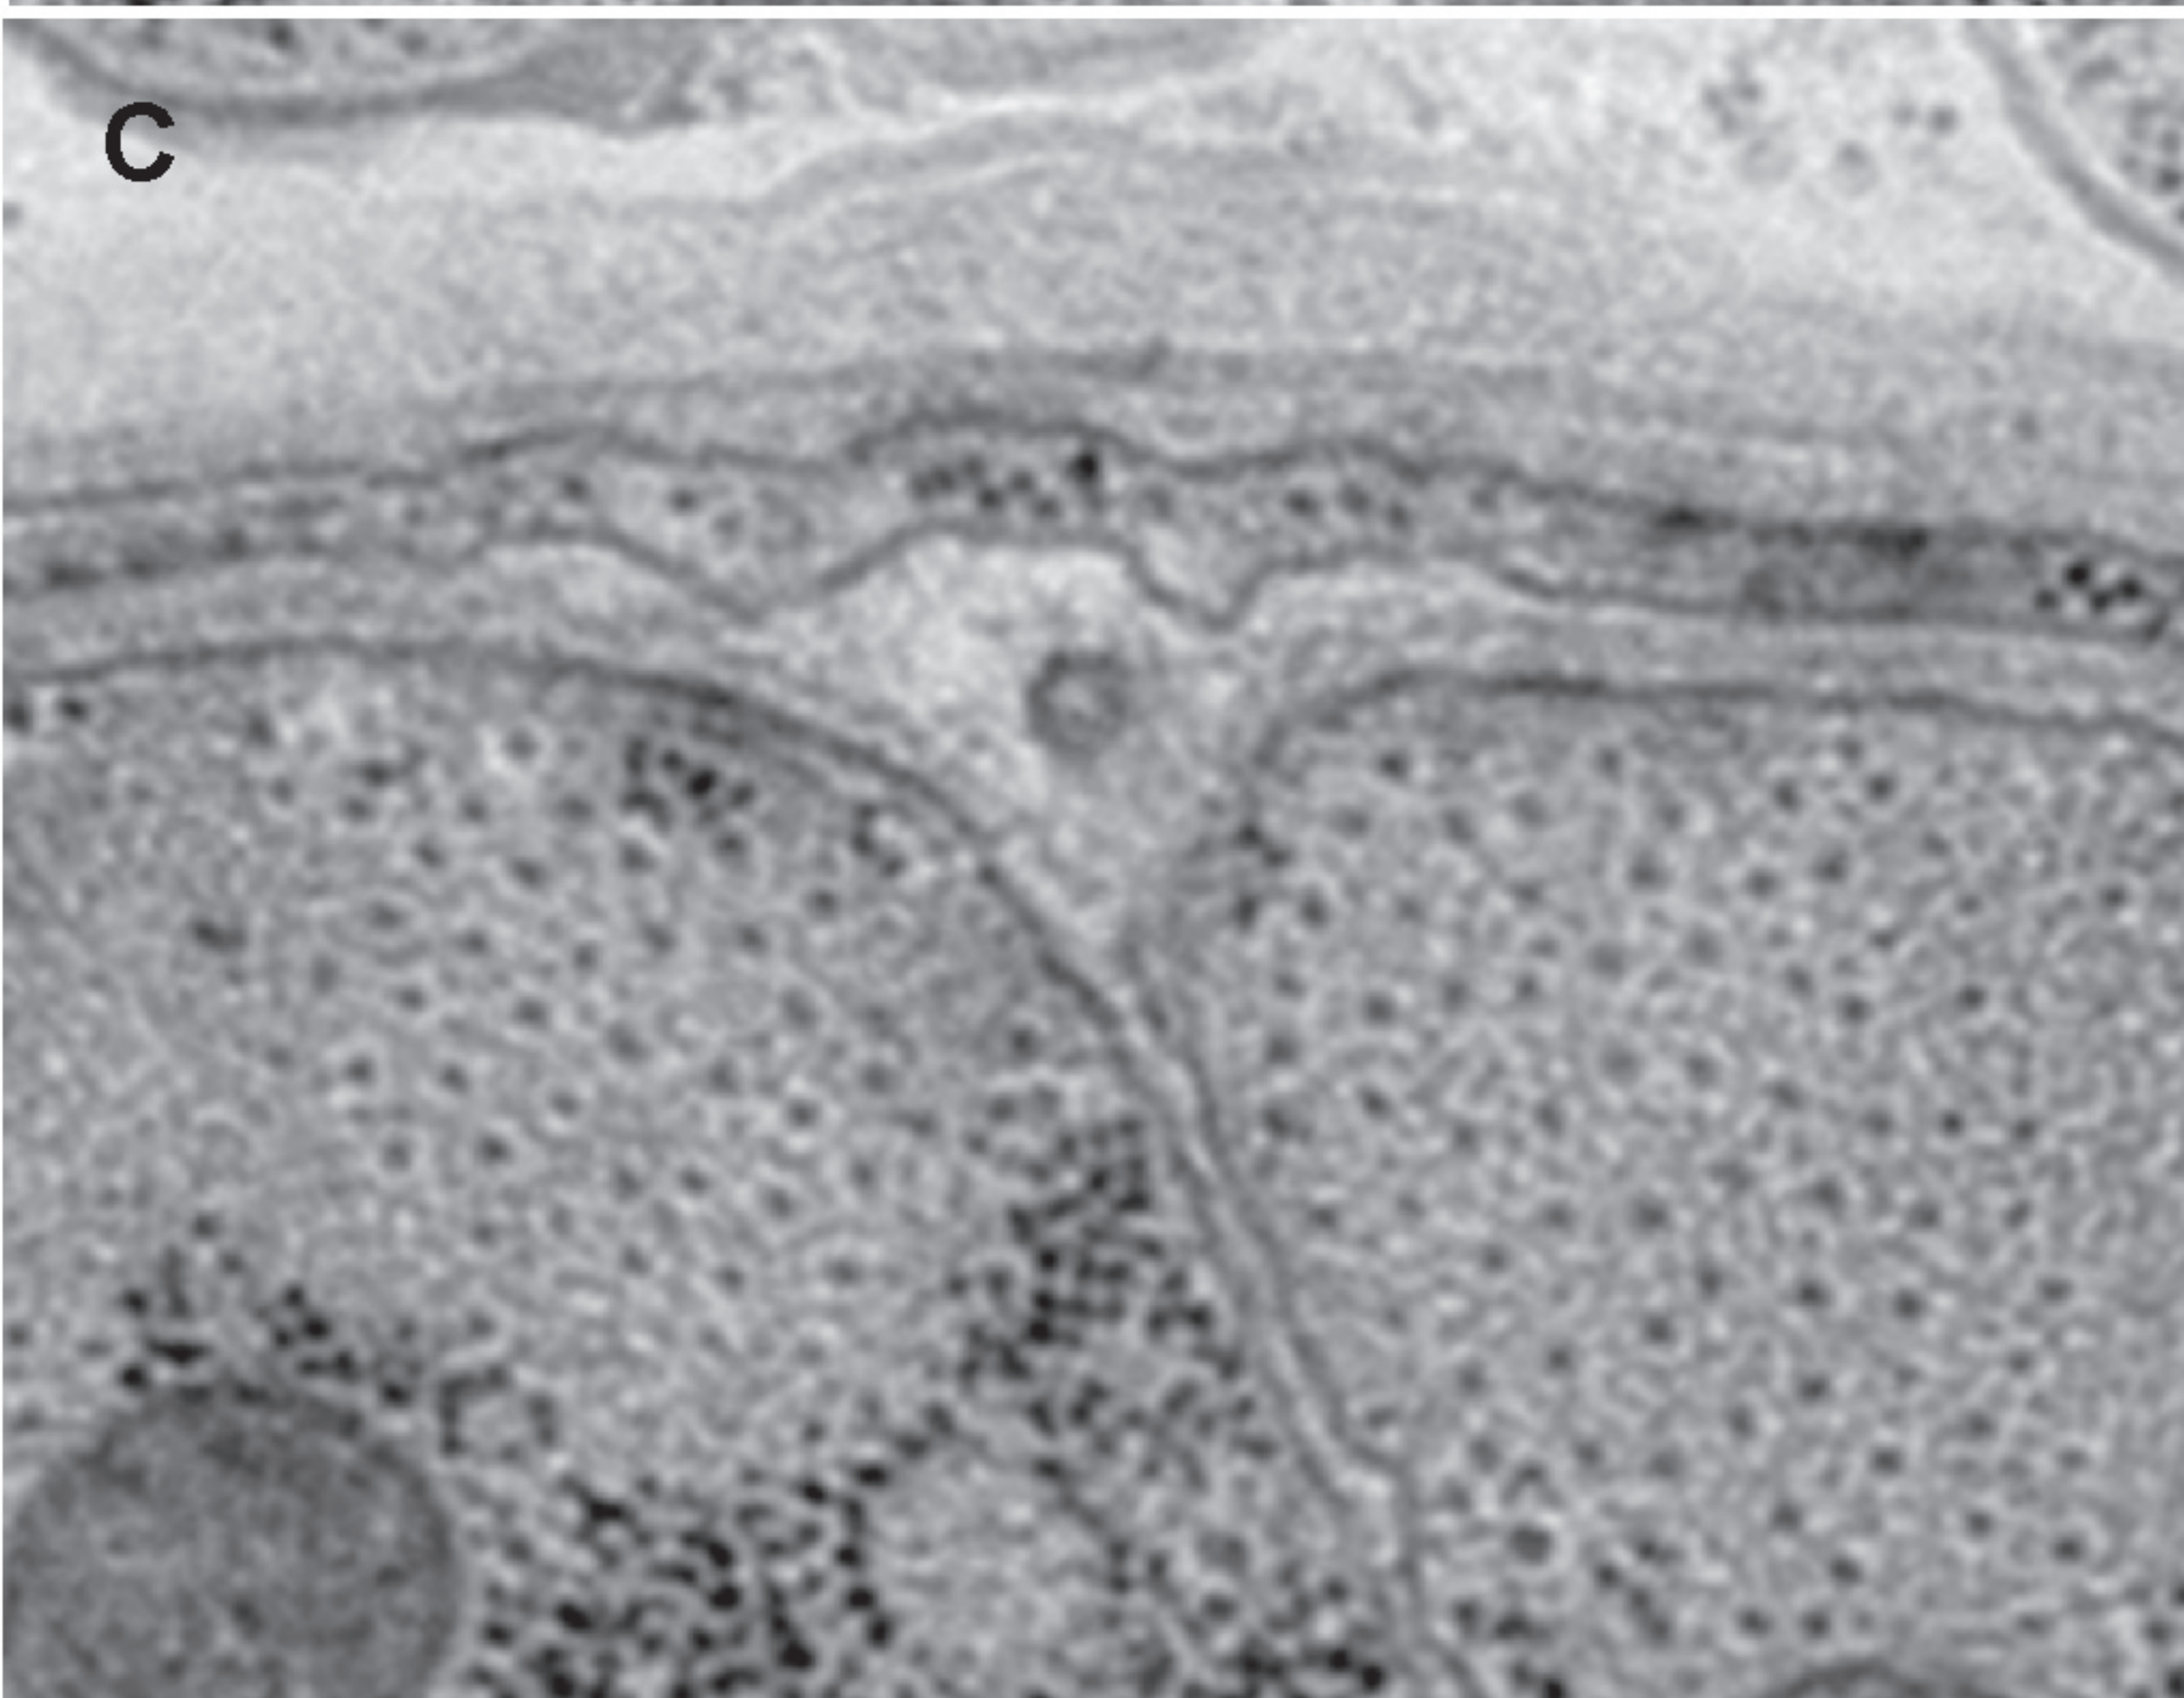**D**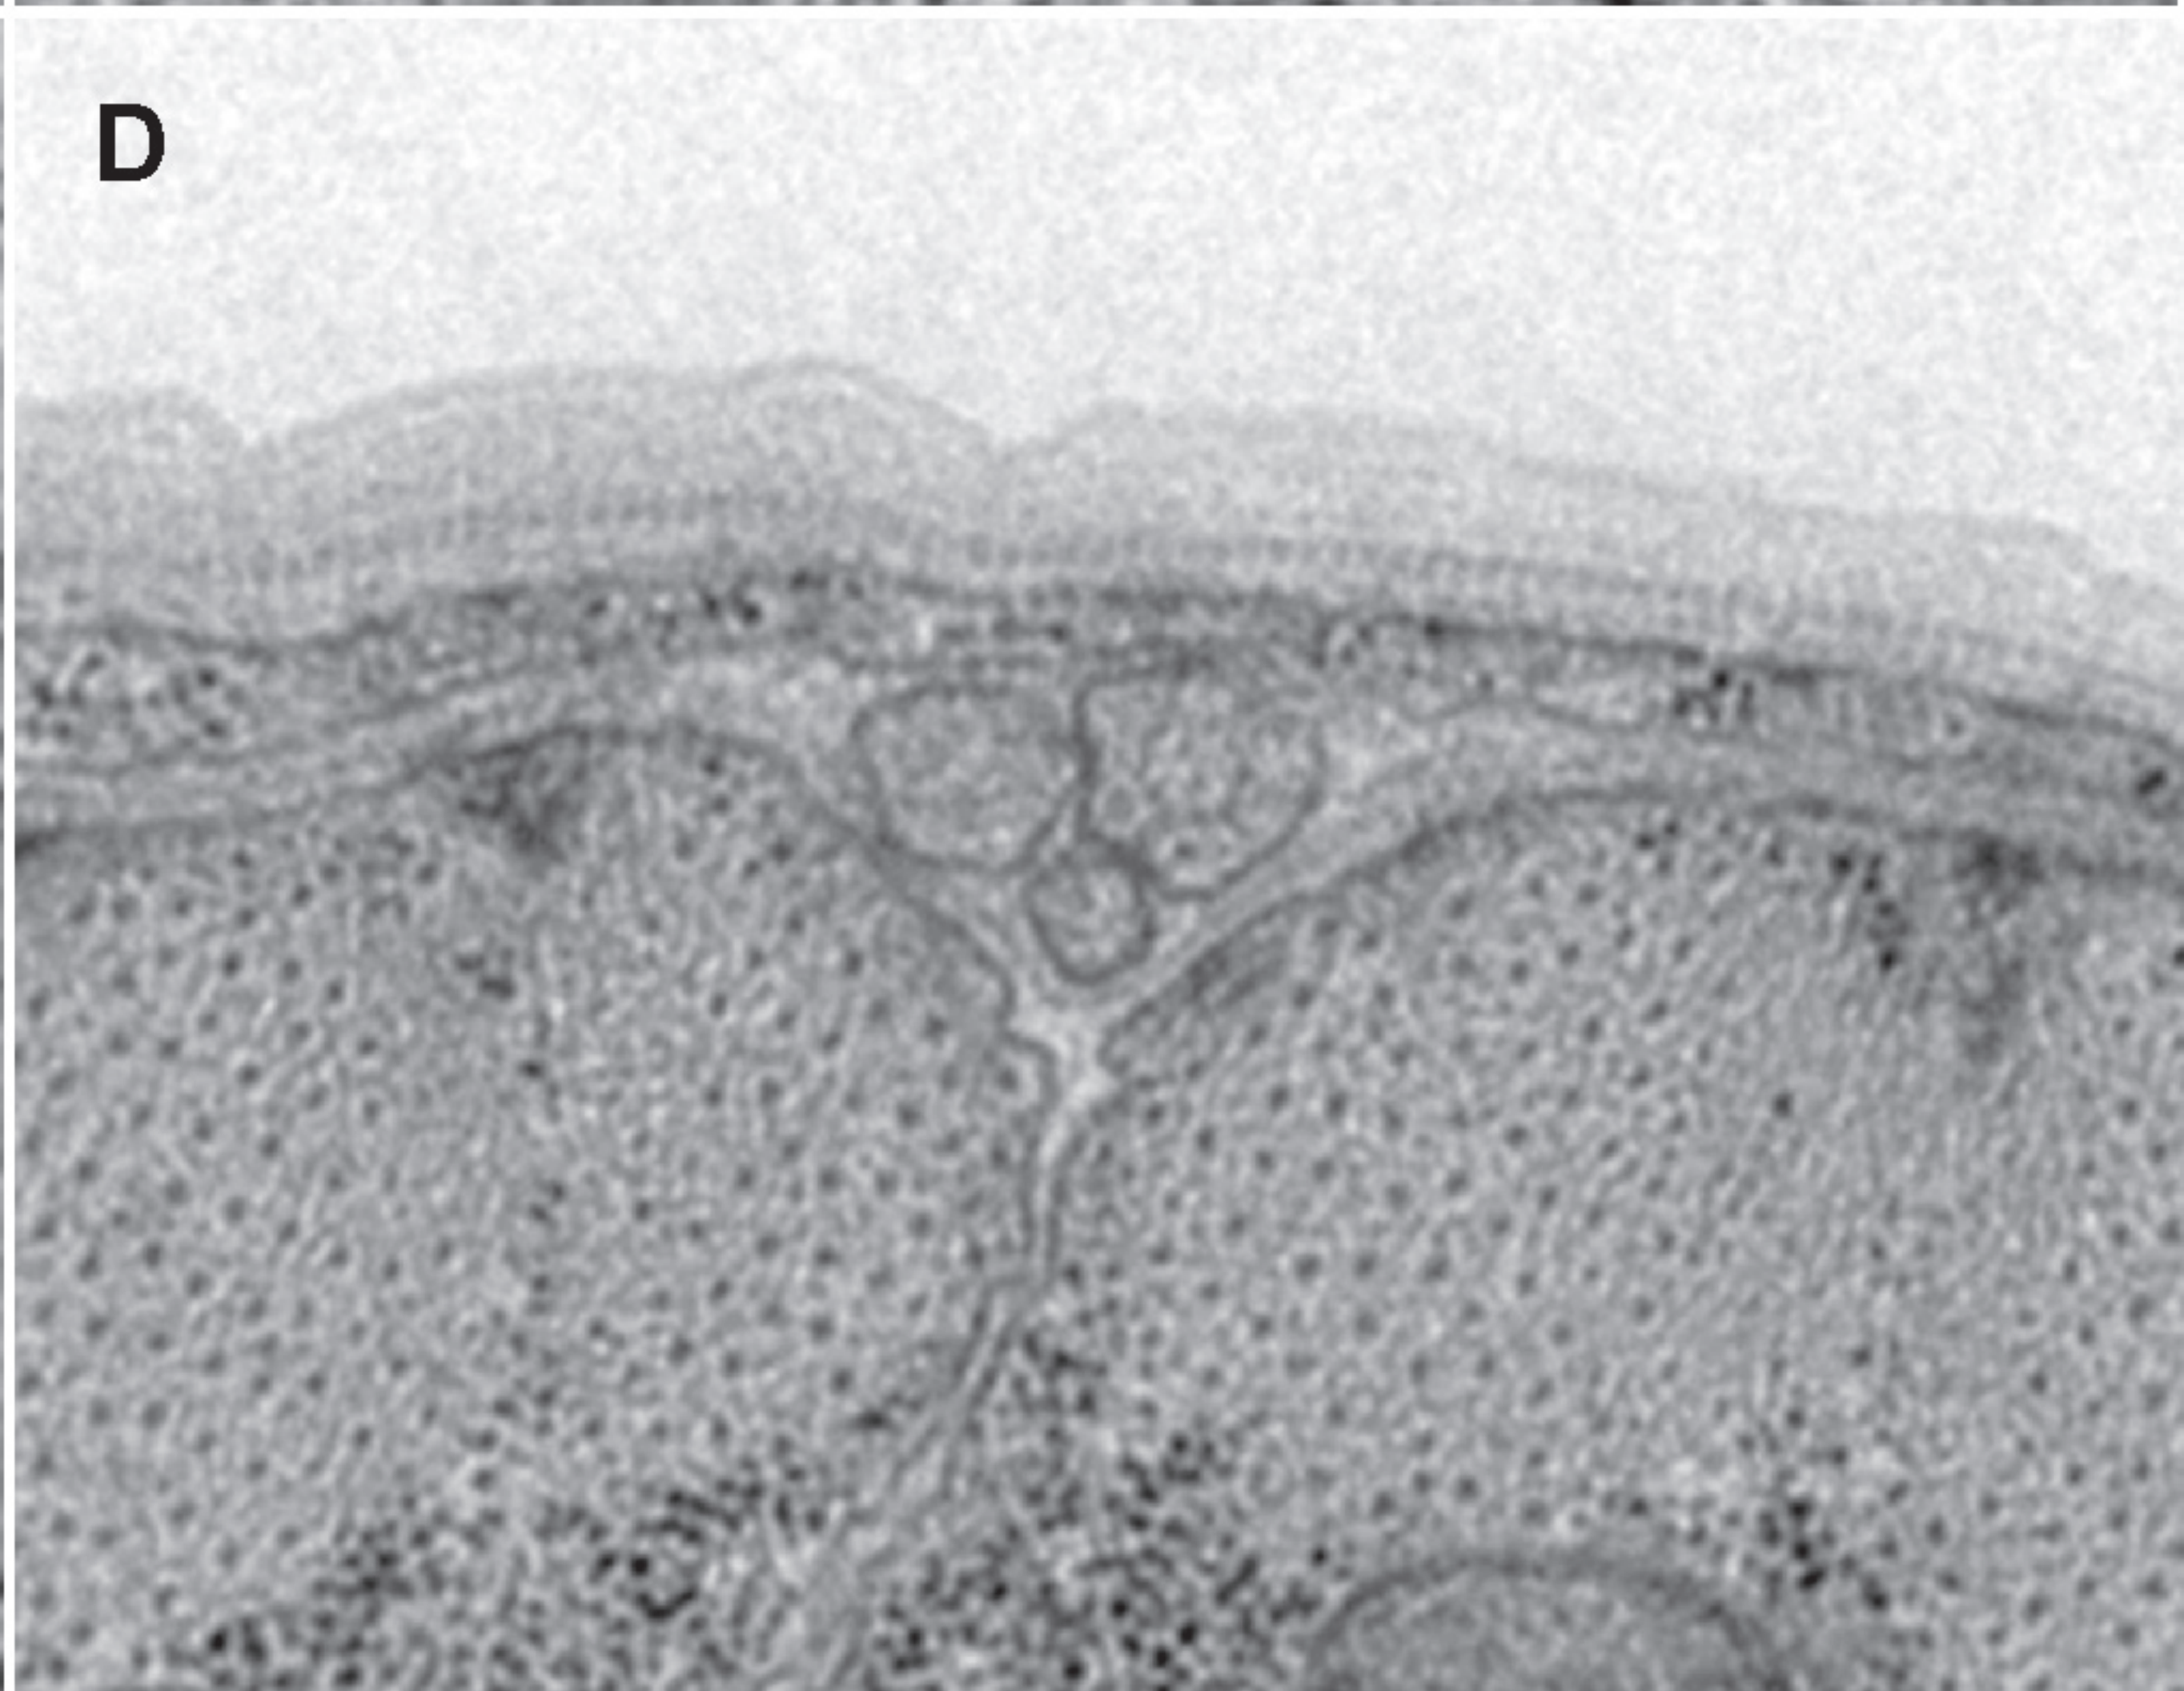

Supplement: supp_136_22_3801__4.pdf [file supp_136_22_3801__4.pdf]
